# Supplementary material
Source: publisher figshare collection journal article supplement (https://acs.figshare.com/ndownloader/files/3884089)
Supplement: Supplementary file 1 [file 3884089]

## **Supporting Information**

### **Hollow Structured Micro/Nano MoS<sub>2</sub> Spheres for High Electrocatalytic Activity Hydrogen Evolution Reaction**

*Bangjun Guo, Ke Yu,\* Honglin Li, Haili Song, Yuanyuan Zhang, Xiang Lei, Hao Fu, Yinghua Tan and  
Ziqiang Zhu*

Key Laboratory of Polar Materials and Devices (Ministry of Education of China), Department of  
Electronic Engineering, East China Normal University, Shanghai 200241, P. R. China

#### **AUTHOR INFORMATION**

##### **Corresponding Author**

\* Tel.: +86 21 54345198; Fax: +86 21 54345119. E-mail address: yk5188@263.net

# ADDITIONAL EXPERIMENTAL DATA

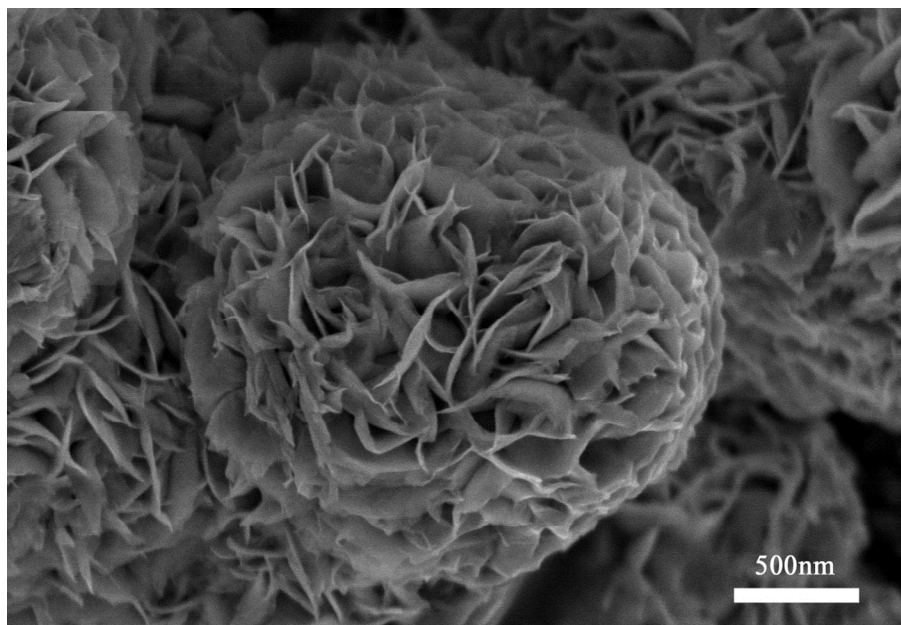

Figure S1. Medium SEM image of F-MoS<sub>2</sub>.

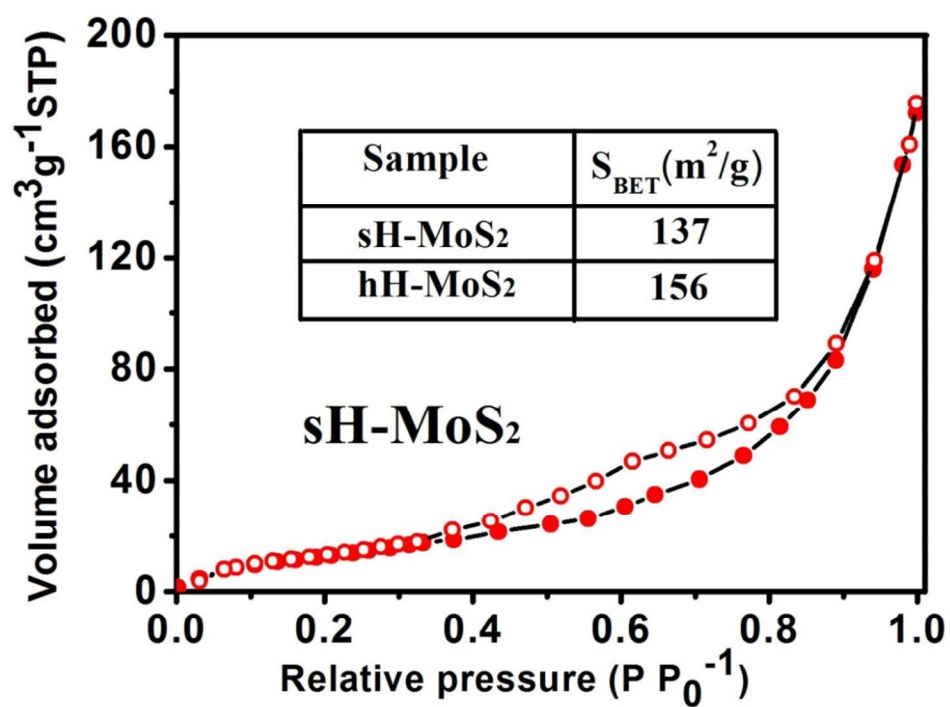

Figure S2. N<sub>2</sub> adsorption–desorption isotherms of sH-MoS<sub>2</sub>.

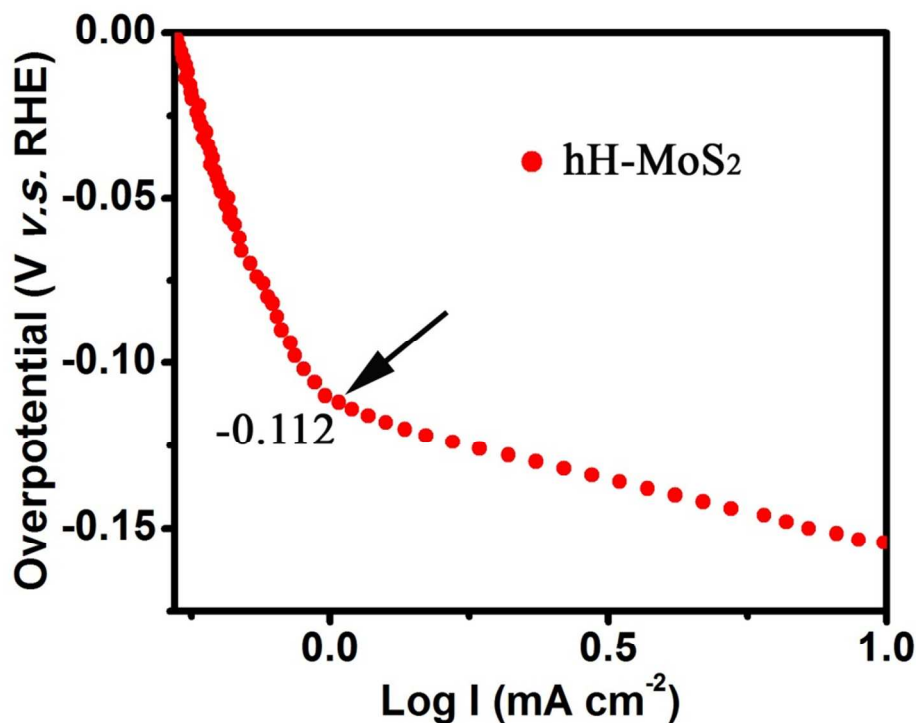

**Figure S3.** The semi-log Tafel plot of the hH-MoS<sub>2</sub> in the region of low current densities.

The onset potential for HER was calculated from the semi-log (Tafel) plot. As can be seen from Figure S3, the semi-log plot of hH-MoS<sub>2</sub> nanomaterials showed a linear relationship below -0.112 V but started to deviate above -0.112 V in the region of low current densities. Therefore, -0.112 V was chosen as the onset overpotential for the unique hH-MoS<sub>2</sub> nanomaterial. The same method was also applied on determining the onset overpotential for other two samples.

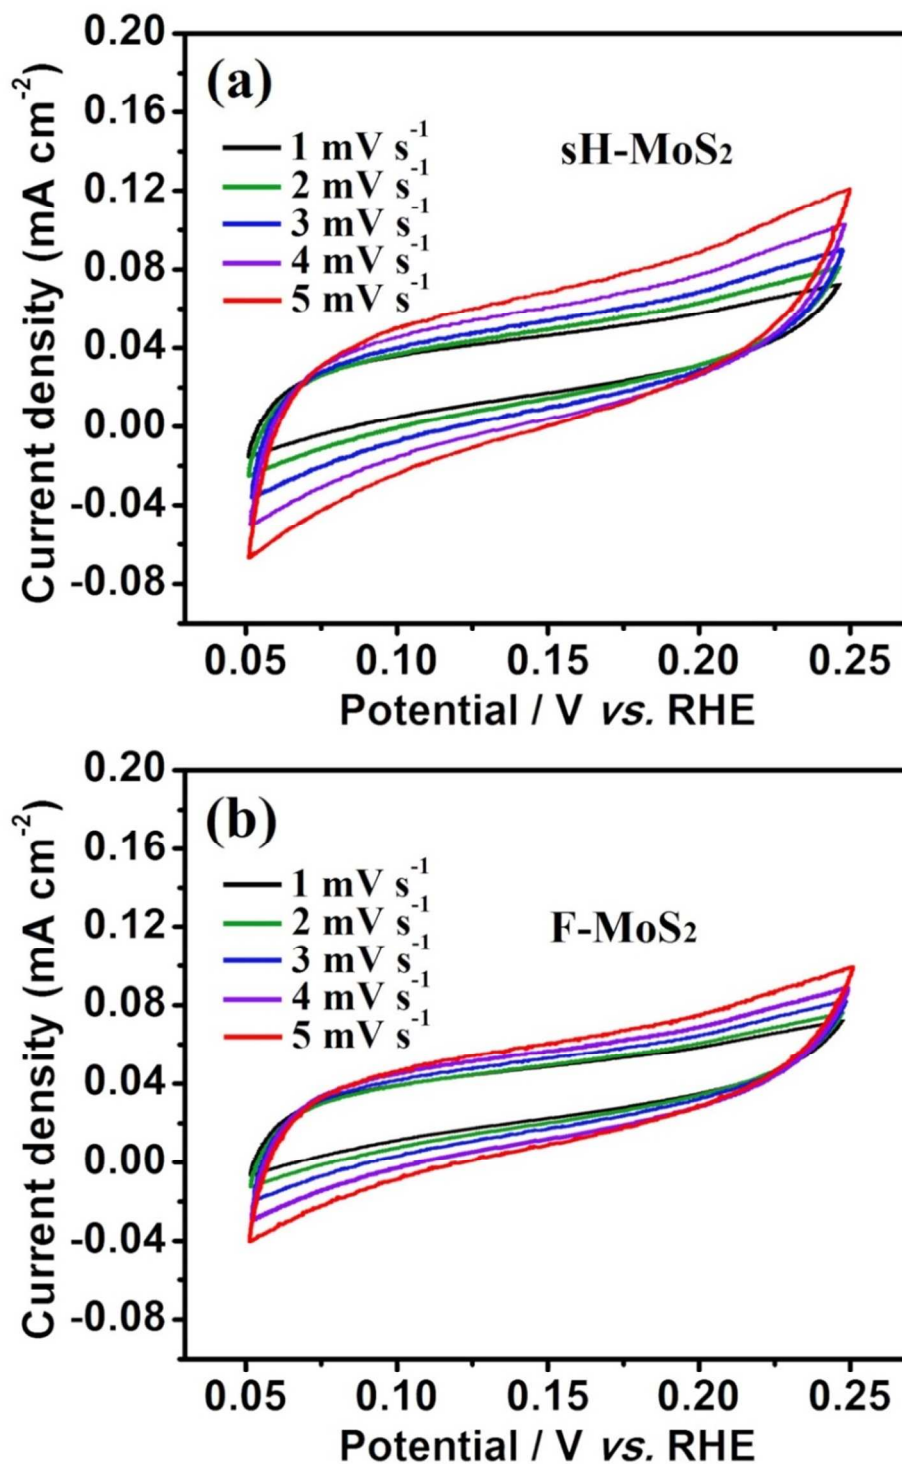

**Figure S4.** (a) Cyclic voltammetry curves of sH-MoS<sub>2</sub> at various scan rates in the region of 0.05-0.25 V vs. RHE. (b) Cyclic voltammetry curves of F-MoS<sub>2</sub> at various scan rates in the region of 0.05-0.25 V vs. RHE.
